# Supplementary material for: Association of Fine Particulate Matter Exposure With Bystander-Witnessed Out-of-Hospital Cardiac Arrest of Cardiac Origin in Japan
Source: PubMed Central journal article supplement (PMC7165302; doi:10.1001/jamanetworkopen.2020.3043), 2020-04-17

## Supplementary Online Content

Kojima S, Michikawa T, Matsui K, et al; the Japanese Circulation Society With Resuscitation Science Study (JCS-ReSS) Group. Association of fine particulate matter exposure with bystander-witnessed out-of-hospital cardiac arrest of cardiac origin in Japan. *JAMA Netw Open*. 2020;3(4):e203043.  
doi:10.1001/jamanetworkopen.2020.3043

**eTable 1.** Descriptive Data on the Study Period of Bystander Witnessed Out-of-Hospital Cardiac Arrest of Cardiac Origin and Environmental Factors for 47 Prefectures in Japan

**eTable 2.** Overall Statistics of Environmental Factors in 47 Prefectures in Japan, from April 2011 to December 2016

**eTable 3.** Pearson's Correlation Coefficients Among Daily Mean Pollutant Concentrations

**eFigure 1.** Location of 47 Japanese Prefectures and Daily Mean PM<sub>2.5</sub> Concentrations

**eFigure 2.** Prefecture-Specific Odds Ratios of Bystander-Witnessed Out-of-Hospital Cardiac Arrest of Cardiac Origin Incidence With a 10 µg/m<sup>3</sup> increase in PM<sub>2.5</sub> Concentrations at lag0-1

This supplementary material has been provided by the authors to give readers additional information about their work.

**eTable 1.** Descriptive Data on the Study Period of Bystander Witnessed Out-of-Hospital Cardiac Arrest of Cardiac Origin and Environmental Factors for 47 Prefectures in Japan

| No. | Prefecture | Region  | Study period | Days   | PM <sub>2.5</sub> (µg/m <sup>3</sup> ) |       |      |                  |        |                  | O <sub>3</sub> (ppb) |       |      | NO <sub>2</sub> (ppb) |       |      | SO <sub>2</sub> (ppb) |       |     | Ambient temperature (°C) |       |      | Relative humidity (%) |       |    |    |
|-----|------------|---------|--------------|--------|----------------------------------------|-------|------|------------------|--------|------------------|----------------------|-------|------|-----------------------|-------|------|-----------------------|-------|-----|--------------------------|-------|------|-----------------------|-------|----|----|
|     |            |         |              |        | n                                      | Mean  | SD   | 25 <sup>th</sup> | Median | 75 <sup>th</sup> | n                    | Mean  | SD   | n                     | Mean  | SD   | n                     | Mean  | SD  | n                        | Mean  | SD   | n                     | Mean  | SD |    |
| 1   | Hokkaido   | East    | Apr-12       | Dec-16 | 1736                                   | 1,726 | 7.9  | 5.7              | 4.3    | 6.7              | 10.4                 | 977   | 41.5 | 11.4                  | 1,734 | 9.6  | 7.2                   | 1,736 | 0.6 | 0.9                      | 1,736 | 10.1 | 9.6                   | 1,736 | 68 | 11 |
| 2   | Aomori     | East    | Apr-13       | Dec-16 | 1371                                   | 1,363 | 11.5 | 6.6              | 7.2    | 10.2             | 14.0                 |       |      |                       | 1,371 | 11.7 | 8.8                   |       |     |                          | 1,371 | 11.7 | 8.8                   | 1,367 | 75 | 11 |
| 3   | Iwate      | East    | Apr-11       | Dec-16 | 2102                                   | 2,070 | 12.9 | 6.6              | 8.1    | 11.7             | 16.5                 | 2,024 | 37.5 | 12.0                  | 2,077 | 8.4  | 5.5                   | 2,077 | 0.4 | 0.5                      | 2,102 | 11.4 | 9.5                   | 2,099 | 74 | 11 |
| 4   | Miyagi     | East    | Apr-11       | Dec-16 | 2102                                   | 2,063 | 12.2 | 7.5              | 6.9    | 10.8             | 16.1                 | 2,057 | 39.3 | 12.1                  | 1,712 | 10.4 | 5.3                   | 2,071 | 0.5 | 0.5                      | 2,102 | 13.5 | 8.5                   | 2,102 | 70 | 13 |
| 5   | Akita      | East    | Apr-12       | Dec-16 | 1736                                   | 1,718 | 13.2 | 7.7              | 7.9    | 11.0             | 16.3                 | 1,725 | 44.5 | 11.0                  | 1,720 | 4.6  | 2.6                   | 1,731 | 0.9 | 0.7                      | 1,736 | 12.9 | 9.1                   | 1,736 | 73 | 11 |
| 6   | Yamagata   | East    | Apr-12       | Dec-16 | 1736                                   | 1,719 | 11.7 | 7.4              | 6.4    | 10.0             | 15.6                 | 1,698 | 42.2 | 13.3                  | 1,675 | 9.6  | 6.1                   | 1,700 | 1.1 | 0.8                      | 1,736 | 12.9 | 9.4                   | 1,736 | 72 | 12 |
| 7   | Fukushima  | East    | Apr-14       | Dec-16 | 1006                                   | 996   | 10.5 | 6.3              | 5.8    | 9.2              | 14.0                 | 994   | 40.2 | 12.7                  | 997   | 8.1  | 4.9                   | 1,001 | 0.5 | 0.5                      | 1,006 | 14.9 | 8.4                   | 1,006 | 70 | 14 |
| 8   | Ibaraki    | East    | Apr-12       | Dec-16 | 1736                                   | 1,701 | 11.5 | 6.7              | 6.7    | 10.0             | 14.4                 | 1,708 | 42.5 | 13.4                  | 1,712 | 7.6  | 3.2                   | 1,721 | 0.6 | 0.4                      | 1,736 | 15.0 | 8.1                   | 1,736 | 73 | 13 |
| 9   | Tochigi    | East    | Apr-13       | Dec-16 | 1371                                   | 1,364 | 12.9 | 7.1              | 7.9    | 11.5             | 16.6                 | 1,359 | 46.0 | 17.9                  | 1,356 | 10.4 | 4.8                   |       |     |                          | 1,371 | 15.3 | 8.3                   | 1,371 | 68 | 14 |
| 10  | Gunma      | East    | Apr-11       | Dec-16 | 2102                                   | 2,067 | 14.2 | 9.0              | 7.5    | 13.2             | 19.5                 | 2,075 | 47.1 | 16.9                  | 2,092 | 7.6  | 3.9                   | 2,050 | 1.4 | 0.7                      | 2,102 | 15.7 | 8.6                   | 2,102 | 61 | 15 |
| 11  | Saitama    | East    | Apr-13       | Dec-16 | 1371                                   | 1,363 | 13.3 | 7.5              | 7.9    | 11.8             | 17.0                 | 1,363 | 42.3 | 17.4                  | 1,328 | 15.1 | 7.1                   | 1,365 | 0.8 | 0.5                      | 1,371 | 16.4 | 8.2                   | 1,371 | 64 | 16 |
| 12  | Chiba      | East    | Apr-12       | Dec-16 | 1736                                   | 1,713 | 14.4 | 9.6              | 7.8    | 12.1             | 18.6                 | 1,725 | 39.8 | 15.2                  | 1,729 | 11.1 | 6.3                   | 1,733 | 1.7 | 1.1                      | 1,736 | 17.0 | 7.6                   | 1,736 | 66 | 16 |
| 13  | Tokyo      | East    | Apr-11       | Dec-16 | 2102                                   | 2,060 | 16.6 | 8.6              | 10.5   | 14.8             | 20.7                 | 2,070 | 35.2 | 14.7                  | 2,081 | 22.8 | 9.2                   | 2,087 | 2.0 | 1.1                      | 2,102 | 17.0 | 8.0                   | 2,102 | 64 | 16 |
| 14  | Kanagawa   | East    | Apr-12       | Dec-16 | 1736                                   | 1,718 | 14.3 | 8.2              | 8.5    | 12.6             | 18.3                 | 1,722 | 38.1 | 15.7                  | 1,715 | 17.8 | 8.3                   | 1,674 | 3.8 | 2.7                      | 1,736 | 17.0 | 7.6                   | 1,721 | 68 | 16 |
| 15  | Niigata    | East    | Apr-12       | Dec-16 | 1736                                   | 1,705 | 11.9 | 7.7              | 6.7    | 10.3             | 15.0                 | 1,624 | 45.7 | 12.1                  | 1,677 | 8.5  | 4.1                   | 1,660 | 1.4 | 0.8                      | 1,736 | 14.7 | 8.7                   | 1,736 | 73 | 10 |
| 16  | Toyama     | Central | Apr-12       | Dec-16 | 1736                                   | 1,730 | 10.5 | 7.2              | 5.6    | 9.0              | 13.8                 | 1,678 | 46.1 | 12.3                  | 1,730 | 7.8  | 3.9                   | 1,734 | 0.8 | 0.5                      | 1,736 | 15.3 | 8.8                   | 1,736 | 73 | 12 |
| 17  | Ishikawa   | Central | Apr-13       | Dec-16 | 1371                                   | 1,350 | 11.7 | 7.1              | 6.8    | 9.9              | 14.9                 | 1,355 | 44.6 | 13.3                  | 1,363 | 8.7  | 4.0                   | 1,367 | 1.4 | 1.6                      | 1,371 | 16.0 | 8.4                   | 1,371 | 70 | 11 |
| 18  | Fukui      | Central | Apr-11       | Dec-16 | 2102                                   | 2,032 | 14.5 | 8.4              | 8.5    | 12.9             | 18.7                 | 2,019 | 43.7 | 14.5                  | 2,025 | 7.8  | 3.9                   | 2,048 | 1.1 | 0.7                      | 2,102 | 15.5 | 8.9                   | 2,102 | 74 | 11 |
| 19  | Yamanashi  | East    | Apr-11       | Dec-16 | 2102                                   | 2,078 | 12.1 | 7.5              | 6.9    | 10.6             | 15.9                 | 2,055 | 42.9 | 14.9                  | 2,081 | 11.5 | 6.3                   | 2,079 | 1.5 | 0.8                      | 2,102 | 15.7 | 8.8                   | 2,102 | 63 | 14 |
| 20  | Nagano     | East    | Apr-11       | Dec-16 | 2102                                   | 1,985 | 11.4 | 6.8              | 6.3    | 10.1             | 15.2                 | 2,040 | 44.3 | 14.2                  | 2,072 | 5.6  | 4.5                   | 2,076 | 2.7 | 2.1                      | 2,102 | 13.0 | 9.5                   | 2,102 | 73 | 11 |
| 21  | Gifu       | Central | Apr-12       | Dec-16 | 1736                                   | 1,678 | 12.7 | 7.6              | 7.2    | 11.6             | 16.6                 | 1,713 | 44.9 | 15.0                  | 1,686 | 8.9  | 3.7                   | 1,728 | 0.7 | 0.7                      | 1,736 | 16.9 | 8.5                   | 1,736 | 66 | 13 |
| 22  | Shizuoka   | East    | Apr-13       | Dec-16 | 1371                                   | 1,348 | 12.3 | 7.2              | 7.3    | 10.7             | 15.2                 | 1,312 | 44.0 | 14.9                  | 1,363 | 9.5  | 3.6                   | 1,293 | 1.3 | 0.4                      | 1,371 | 17.7 | 7.2                   | 1,371 | 68 | 14 |

|    |           |         |        |        |      |       |      |      |      |      |      |       |      |      |       |      |     |       |     |     |       |      |     |       |    |    |
|----|-----------|---------|--------|--------|------|-------|------|------|------|------|------|-------|------|------|-------|------|-----|-------|-----|-----|-------|------|-----|-------|----|----|
| 23 | Aichi     | Central | Apr-11 | Dec-16 | 2102 | 2,055 | 15.7 | 8.9  | 9.3  | 14.1 | 20.1 | 2,052 | 43.1 | 15.7 | 2,063 | 15.1 | 7.6 | 2,067 | 1.6 | 0.8 | 2,102 | 16.8 | 8.5 | 2,102 | 66 | 13 |
| 24 | Mie       | Central | Apr-12 | Dec-16 | 1736 | 1,722 | 12.8 | 7.6  | 7.2  | 11.5 | 16.5 | 1,717 | 46.8 | 14.7 | 1,726 | 7.2  | 4.4 | 1,729 | 1.4 | 0.6 | 1,736 | 17.0 | 8.1 | 1,736 | 67 | 13 |
| 25 | Shiga     | Central | Apr-13 | Dec-16 | 1371 | 1,354 | 12.0 | 7.4  | 6.6  | 10.5 | 15.9 | 1,339 | 46.4 | 13.7 | 1,354 | 7.0  | 4.0 |       |     |     | 1,371 | 16.1 | 8.3 | 1,371 | 72 | 10 |
| 26 | Kyoto     | Central | Apr-12 | Dec-16 | 1736 | 1,700 | 13.6 | 7.3  | 8.4  | 12.1 | 17.2 | 1,592 | 43.5 | 15.0 | 1,625 | 11.8 | 5.6 | 1,730 | 3.6 | 1.1 | 1,736 | 17.0 | 8.6 | 1,736 | 66 | 10 |
| 27 | Osaka     | Central | Apr-12 | Dec-16 | 1736 | 1,721 | 17.1 | 8.9  | 10.5 | 15.3 | 21.4 | 1,680 | 35.9 | 14.9 | 1,708 | 23.3 | 9.1 | 1,675 | 4.3 | 2.1 | 1,736 | 17.7 | 8.2 | 1,736 | 64 | 11 |
| 28 | Hyogo     | Central | Apr-13 | Dec-16 | 1371 | 1,361 | 14.5 | 8.0  | 8.8  | 12.8 | 18.5 | 1,352 | 40.8 | 14.8 | 936   | 15.8 | 7.7 | 1,358 | 2.8 | 1.8 | 1,371 | 17.9 | 7.9 | 1,371 | 64 | 11 |
| 29 | Nara      | Central | Apr-12 | Dec-16 | 1736 | 1,706 | 12.8 | 7.8  | 7.0  | 11.2 | 16.7 | 1,637 | 44.0 | 15.6 | 1,701 | 9.2  | 4.8 | 1,695 | 3.5 | 1.3 | 1,736 | 15.9 | 8.4 | 1,736 | 74 | 11 |
| 30 | Wakayama  | Central | Apr-12 | Dec-16 | 1736 | 1,724 | 15.2 | 7.8  | 9.8  | 14.0 | 19.1 | 1,720 | 43.7 | 14.9 | 1,719 | 8.7  | 3.6 | 1,723 | 2.5 | 1.2 | 1,736 | 17.6 | 8.0 | 1,736 | 67 | 11 |
| 31 | Tottori   | West    | Apr-11 | Dec-16 | 2102 | 2,053 | 16.0 | 8.6  | 9.9  | 14.2 | 20.2 | 2,063 | 44.7 | 13.0 | 2,082 | 3.7  | 2.3 | 2,088 | 0.5 | 0.9 | 2,102 | 15.8 | 8.5 | 2,101 | 73 | 10 |
| 32 | Shimane   | West    | Apr-13 | Dec-16 | 1371 | 1,331 | 14.0 | 7.8  | 8.3  | 12.2 | 18.3 | 1,300 | 48.2 | 14.1 | 1,245 | 2.7  | 1.4 | 362   | 0.7 | 0.7 | 1,371 | 16.1 | 8.0 | 1,370 | 77 | 10 |
| 33 | Okayama   | West    | Apr-12 | Dec-16 | 1736 | 1,728 | 17.6 | 9.1  | 11.1 | 15.6 | 22.4 | 1,723 | 42.7 | 15.8 | 1,718 | 11.5 | 4.9 | 1,736 | 4.9 | 1.6 | 1,736 | 16.9 | 8.4 | 1,736 | 68 | 12 |
| 34 | Hiroshima | West    | Apr-11 | Dec-16 | 2102 | 2,035 | 18.2 | 8.5  | 11.8 | 16.7 | 23.0 | 2,000 | 43.6 | 16.2 | 2,029 | 13.3 | 6.2 | 2,090 | 1.1 | 0.8 | 2,102 | 17.0 | 8.3 | 2,102 | 66 | 11 |
| 35 | Yamaguchi | West    | Jun-11 | Dec-16 | 2041 | 1,925 | 14.6 | 8.3  | 8.4  | 13.1 | 19.1 | 2,009 | 41.1 | 15.1 | 2,024 | 8.7  | 3.9 | 2,027 | 0.9 | 0.7 | 2,041 | 16.3 | 8.5 | 2,041 | 74 | 10 |
| 36 | Tokushima | Central | Apr-11 | Dec-16 | 2102 | 2,018 | 13.9 | 8.3  | 7.9  | 12.2 | 17.8 | 2,056 | 43.3 | 15.9 | 1,918 | 9.5  | 4.4 | 2,089 | 1.3 | 0.8 | 2,102 | 17.3 | 7.9 | 2,102 | 69 | 12 |
| 37 | Kagawa    | West    | Apr-12 | Dec-16 | 1736 | 1,716 | 17.9 | 9.6  | 11.0 | 16.0 | 22.8 | 1,664 | 39.7 | 13.8 | 1,728 | 14.4 | 8.0 | 1,732 | 6.4 | 3.3 | 1,736 | 17.4 | 8.2 | 1,736 | 67 | 12 |
| 38 | Ehime     | West    | Apr-12 | Dec-16 | 1736 | 1,723 | 16.9 | 8.4  | 10.5 | 15.5 | 21.4 | 1,657 | 39.9 | 13.5 | 1,690 | 10.5 | 4.5 | 1,709 | 2.8 | 2.1 | 1,736 | 17.4 | 7.9 | 1,736 | 69 | 12 |
| 39 | Kochi     | Central | Apr-12 | Dec-16 | 1736 | 1,676 | 14.5 | 7.5  | 9.2  | 12.7 | 18.2 | 1,597 | 42.6 | 13.7 | 1,695 | 5.5  | 3.1 | 1,682 | 3.4 | 1.1 | 1,736 | 17.9 | 7.6 | 1,733 | 70 | 14 |
| 40 | Fukuoka   | West    | Apr-12 | Dec-16 | 1736 | 1,722 | 18.2 | 8.9  | 11.5 | 16.7 | 22.8 | 1,716 | 40.6 | 14.3 | 1,724 | 16.3 | 5.3 | 1,728 | 2.5 | 1.5 | 1,736 | 18.0 | 7.7 | 1,736 | 70 | 13 |
| 41 | Saga      | West    | Apr-12 | Dec-16 | 1736 | 1,712 | 14.8 | 8.8  | 8.3  | 13.3 | 19.7 | 1,717 | 44.5 | 14.7 | 1,727 | 8.1  | 4.1 | 1,716 | 2.1 | 1.2 | 1,736 | 17.6 | 8.0 | 1,736 | 72 | 11 |
| 42 | Nagasaki  | West    | Apr-14 | Dec-16 | 1006 | 1,002 | 15.9 | 8.3  | 9.7  | 14.6 | 20.3 | 987   | 39.8 | 13.1 | 993   | 6.5  | 3.0 | 995   | 1.6 | 1.0 | 1,006 | 18.2 | 7.1 | 1,006 | 74 | 12 |
| 43 | Kumamoto  | West    | Apr-13 | Mar-16 | 1096 | 1,080 | 18.4 | 10.0 | 10.8 | 17.2 | 24.0 | 930   | 44.2 | 15.3 | 1,072 | 8.3  | 4.5 | 1,089 | 2.6 | 2.2 | 1,096 | 17.1 | 8.0 | 1,096 | 72 | 12 |
| 44 | Oita      | West    | Apr-12 | Dec-16 | 1736 | 1,700 | 15.3 | 8.6  | 8.7  | 13.7 | 19.8 | 1,354 | 43.0 | 14.5 | 1,362 | 6.9  | 3.0 | 1,370 | 2.4 | 1.3 | 1,736 | 17.3 | 7.6 | 1,736 | 71 | 12 |
| 45 | Miyazaki  | West    | May-13 | Dec-16 | 1341 | 1,293 | 13.1 | 8.0  | 7.5  | 11.6 | 17.3 | 1,328 | 32.2 | 12.9 | 886   | 4.4  | 2.3 | 1,331 | 3.8 | 2.1 | 1,341 | 18.5 | 7.3 | 1,341 | 76 | 12 |
| 46 | Kagoshima | West    | Apr-12 | Dec-16 | 1736 | 1,676 | 17.0 | 8.3  | 10.9 | 15.6 | 21.7 | 1,640 | 40.8 | 13.1 | 1,683 | 5.8  | 3.7 | 1,671 | 2.0 | 4.1 | 1,736 | 19.3 | 7.2 | 1,736 | 73 | 11 |
| 47 | Okinawa   | —       | Apr-14 | Dec-16 | 1006 | 942   | 9.9  | 5.8  | 5.7  | 8.4  | 12.3 | 965   | 34.5 | 15.6 | 981   | 6.7  | 3.4 | 963   | 0.4 | 0.6 | 1,006 | 24.2 | 4.7 | 1,006 | 74 | 11 |

NO<sub>2</sub>, nitrogen dioxide; O<sub>3</sub>, ozone; PM<sub>2.5</sub>, particulate matter with an aerodynamic diameter ≤2.5 μm; ppb, parts per billion; SD, standard deviation; SO<sub>2</sub>, sulphur dioxide

**eTable 2.** Overall Statistics of Environmental Factors in 47 Prefectures in Japan, from April 2011 to December 2016

| Environmental Factors (Daily Mean)     | Number of Prefectures | Mean (SD)   | Percentile       |                  |                  |
|----------------------------------------|-----------------------|-------------|------------------|------------------|------------------|
|                                        |                       |             | 25 <sup>th</sup> | 50 <sup>th</sup> | 75 <sup>th</sup> |
| PM <sub>2.5</sub> (µg/m <sup>3</sup> ) | 47                    | 13.9 (7.9)  | 8.2              | 12.4             | 17.9             |
| O <sub>3</sub> (ppb)*                  | 46                    | 42.2 (14.3) | 32.3             | 40.6             | 51.2             |
| NO <sub>2</sub> (ppb)                  | 47                    | 9.9 (4.9)   | 6.3              | 8.9              | 12.5             |
| SO <sub>2</sub> (ppb)                  | 44                    | 1.9 (1.2)   | 1.1              | 1.6              | 2.4              |
| Ambient temperature (°C)               | 47                    | 16.3 (8.2)  | 8.9              | 17.0             | 23.2             |
| Relative humidity (%)                  | 47                    | 70 (12)     | 62               | 70               | 78               |

NO<sub>2</sub>, nitrogen dioxide; O<sub>3</sub>, ozone; PM<sub>2.5</sub>, particulate matter with an aerodynamic diameter ≤2.5 µm; ppb, parts per billion; SD, standard deviation; SO<sub>2</sub>, sulphur dioxide

\*Daily maximum 8-h mean concentrations

**eTable 3.** Pearson's Correlation Coefficients Among Daily Mean Pollutant Concentrations

|                                        | PM <sub>2.5</sub> (µg/m <sup>3</sup> ) | O <sub>3</sub> (ppb)* | NO <sub>2</sub> (ppb) | SO <sub>2</sub> (ppb) |
|----------------------------------------|----------------------------------------|-----------------------|-----------------------|-----------------------|
| PM <sub>2.5</sub> (µg/m <sup>3</sup> ) | 1                                      |                       |                       |                       |
| O <sub>3</sub> (ppb)*                  | 0.42                                   | 1                     |                       |                       |
| NO <sub>2</sub> (ppb)                  | 0.31                                   | -0.22                 | 1                     |                       |
| SO <sub>2</sub> (ppb)                  | 0.44                                   | 0.10                  | 0.34                  | 1                     |

NO<sub>2</sub>, nitrogen dioxide; O<sub>3</sub>, ozone; PM<sub>2.5</sub>, particulate matter with an aerodynamic diameter ≤2.5 µm; ppb, parts per billion; SO<sub>2</sub>, sulphur dioxide

\*Daily maximum 8-h mean concentrations

**eFigure 1.** Location of 47 Japanese Prefectures and Daily Mean PM<sub>2.5</sub> Concentrations

Supplementary eFigure 1

Location of 47 Japanese prefectures and daily mean PM<sub>2.5</sub> concentrations

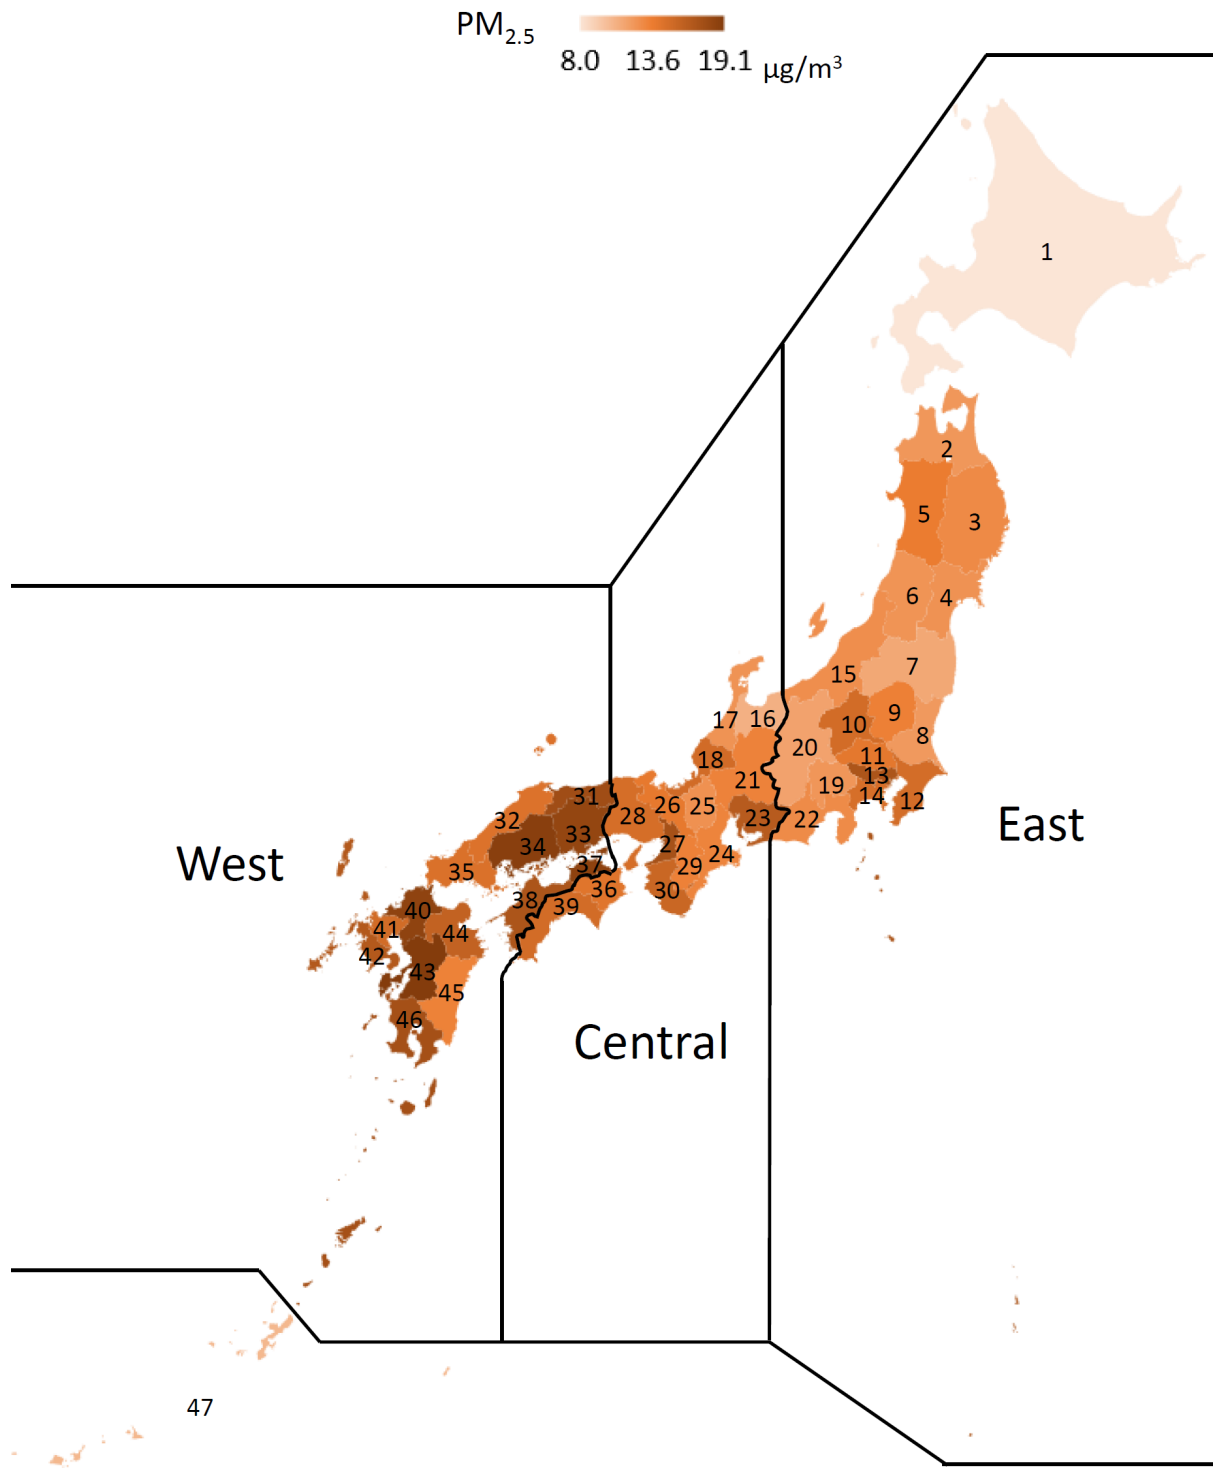

**eFigure 2.** Prefecture-Specific Odds Ratios of Bystander-Witnessed Out-of-Hospital Cardiac Arrest of Cardiac Origin Incidence With a 10  $\mu\text{g}/\text{m}^3$  increase in  $\text{PM}_{2.5}$  Concentrations at lag0-1

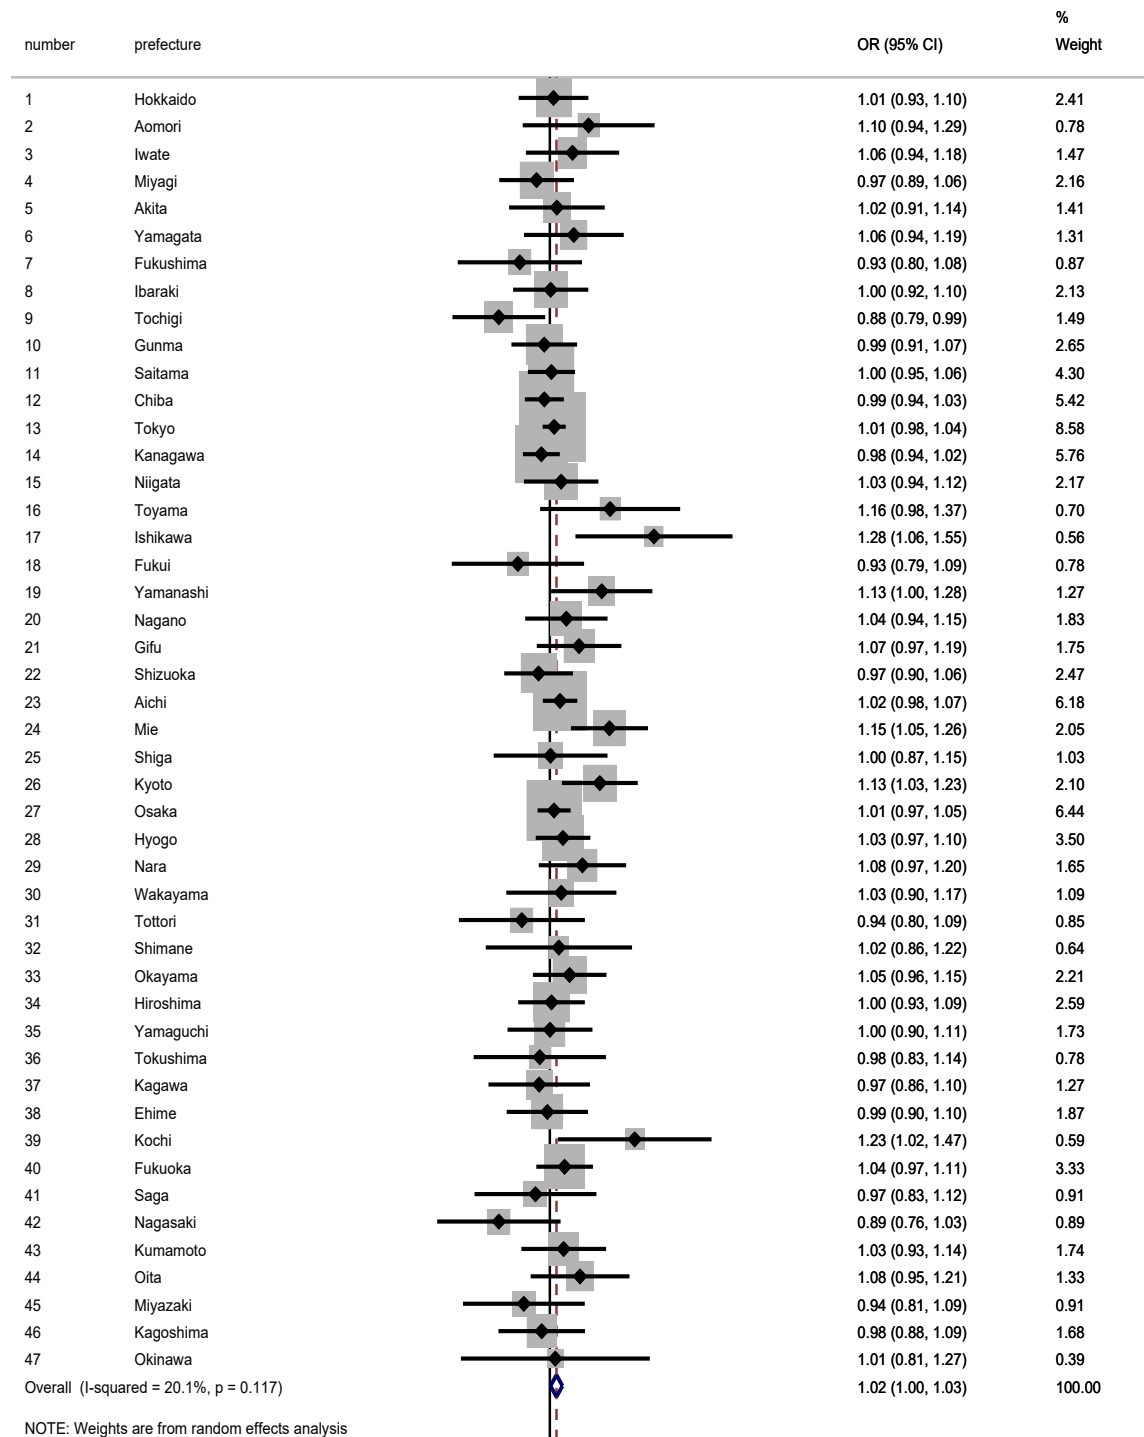

Supplement: jamanetwopen-3-e203043-s001.pdf [file jamanetwopen-3-e203043-s001.pdf]
